# Supplementary material for: Fibre-rich Foods to Treat Obesity and Prevent Colon Cancer trial study protocol: a randomised clinical trial of fibre-rich legumes targeting the gut microbiome, metabolome and gut transit time of overweight and obese patients with a history of noncancerous adenomatous polyps
Source: PubMed Central journal article supplement — BMJ Open. 2024 Feb 5;14(2):e081379. doi: 10.1136/bmjopen-2023-081379 (PMC10860035; doi:10.1136/bmjopen-2023-081379), 2024-02-05
Supplement: bmjopen-2023-081379supp001.pdf [file bmjopen-2023-081379supp001.pdf]

## Meal Plan A – Healthy American Control group meal plan

## Emory GCRC Bionutrition

| Meal             | 1                                                                               | 2                                                                          | 3                                                                          | 4                                                                   | 5                                                                        | 6                                                                                            | 7                                                                                                                                             |
|------------------|---------------------------------------------------------------------------------|----------------------------------------------------------------------------|----------------------------------------------------------------------------|---------------------------------------------------------------------|--------------------------------------------------------------------------|----------------------------------------------------------------------------------------------|-----------------------------------------------------------------------------------------------------------------------------------------------|
| <b>Breakfast</b> |                                                                                 |                                                                            |                                                                            |                                                                     |                                                                          |                                                                                              |                                                                                                                                               |
| <b>Lunch</b>     | Lemon Chicken Potato Casserole                                                  | Quinoa Tofu Pesto                                                          | Turkey Burger on a roll (side of: lettuce, onion, catsup)                  | South of the Border Chicken Stew                                    | Bulgur-Beef Meatballs with Spaghetti & Sauce                             | Lemon Chicken w/ Bulgur                                                                      | Spinach-Cheese Noodles                                                                                                                        |
| <b>Sides</b>     | <i>Non-Starchy Vegetables (i.e. Roasted Brussel Sprouts), Fruit (i.e. Pear)</i> | <i>Non-Starchy Vegetable (i.e. Steamed Asparagus), Fruit (i.e. Orange)</i> | <i>Non-Starchy Vegetable (i.e. Sliced Tomatoes), Fat (i.e. Avocado)</i>    | <i>Starch (i.e. Whole Grain Sliced Bread), Fat (i.e. Avocado)</i>   | <i>Vegetable (i.e. Salad)</i>                                            | <i>Non-Starchy Vegetable (i.e. Green Beans), Fruit (i.e. Nectarine)</i>                      | <i>Protein (i.e. Grilled Salmon), Non-Starchy Vegetable + Combination Food [Carbohydrate &amp; Fat] (i.e. Raw Sweet Peppers &amp; Hummus)</i> |
| <b>Dinner</b>    | Pasta & Peanut Salad                                                            | Stovetop BBQ Chicken with basmati rice & raw spinach                       | Spaghetti with Turkey Meat Sauce                                           | Turkey Meatloaf                                                     | Spiced Chicken & Rice                                                    | Potato Green Bean Bake                                                                       | Beef & Broccoli Stir Fry with Basmati Rice                                                                                                    |
| <b>Sides</b>     | <i>Starch (i.e. Pretzels), Fruit (i.e. Tangerine)</i>                           | <i>Starchy Vegetable (i.e. Corn on the Cob)</i>                            | <i>Starchy Vegetable (i.e. Mixed Vegetable, frozen), Fruit (i.e. Pear)</i> | <i>Starch Vegetable (i.e. Baked Potato), Vegetable (i.e. Salad)</i> | <i>Non-Starchy Vegetable (i.e. Steamed Broccoli), Fat (i.e. Almonds)</i> | <i>Vegetable (i.e. Salad), Non-Starchy Vegetable + Fat (i.e. Celery &amp; Peanut Butter)</i> | <i>Fruit (i.e. Seedless Grapes)</i>                                                                                                           |
