# Supplementary material for: Fibre-rich Foods to Treat Obesity and Prevent Colon Cancer trial study protocol: a randomised clinical trial of fibre-rich legumes targeting the gut microbiome, metabolome and gut transit time of overweight and obese patients with a history of noncancerous adenomatous polyps
Source: PubMed Central journal article supplement — BMJ Open. 2024 Feb 5;14(2):e081379. doi: 10.1136/bmjopen-2023-081379 (PMC10860035; doi:10.1136/bmjopen-2023-081379), 2024-02-05
Supplement: bmjopen-2023-081379supp002.pdf [file bmjopen-2023-081379supp002.pdf]

## Meal Plan B – Legume Intervention group meal plan

Emory GCRC Bionutrition

| Meal             | 1                                                                     | 2                                                                      | 3                                                                                                                | 4                                                                                            | 5                                                                                                         | 6                                                                                               | 7                                                                        |
|------------------|-----------------------------------------------------------------------|------------------------------------------------------------------------|------------------------------------------------------------------------------------------------------------------|----------------------------------------------------------------------------------------------|-----------------------------------------------------------------------------------------------------------|-------------------------------------------------------------------------------------------------|--------------------------------------------------------------------------|
| <b>Breakfast</b> |                                                                       |                                                                        |                                                                                                                  |                                                                                              |                                                                                                           |                                                                                                 |                                                                          |
| <b>Lunch</b>     | Chickpea Salad Sandwich (inc. whole grain bread, lettuce)             | Lentil Tomato Salad                                                    | Black Bean Salad                                                                                                 | Black-Eyed Pea Curry w/ Basmati Rice                                                         | Chana Massala (flavorful chickpea, tomato & spinach stew) w/ Basmati Rice                                 | Falafel (baked chickpea patties) [served with whole wheat pita, lettuce, tomato, onion, tahini] | Southwest Bean Soup                                                      |
| <b>Sides</b>     | <i>Non-Starchy Vegetable (i.e. Tomato Slices), Fruit (i.e. Apple)</i> | <i>Starchy Vegetable (i.e. Baked Sweet Potato), Fruit (i.e. Apple)</i> | <i>Combination Food (carbohydrate, fat) [i.e. Tortilla Chips], Non-Starchy Vegetables (i.e. Cherry Tomatoes)</i> | <i>Fruit (i.e. Orange)</i>                                                                   | <i>Non-Starchy Vegetable + Combination Food (Carbohydrate &amp; Fat) [i.e. Baby Carrots &amp; Hummus]</i> | <i>Non-Starchy Vegetable (i.e. Sliced Cucumber)</i>                                             | <i>Vegetable (i.e. Salad), Fruit (i.e. Apple)</i>                        |
| <b>Dinner</b>    | Pineapple Lentils w/ Basmati Rice                                     | Quinoa Chili                                                           | Bean & Chicken Cassoulet (casserole)                                                                             | Caldo Verde (Potato, Kale & White Bean Soup)                                                 | White Bean Onion Stew                                                                                     | African Peanut Stew                                                                             | Tamale Pie                                                               |
| <b>Sides</b>     | <i>Vegetable (i.e. Salad)</i>                                         | <i>Fat (i.e. Avocado), Fruit (i.e. Peach)</i>                          | <i>Vegetable (i.e. Salad), Non-Starchy Vegetable (i.e. Steamed Broccoli)</i>                                     | <i>Starch (i.e. Whole Grain Toast), Medium-Fat Protein (i.e. Poached or Hard-Boiled Egg)</i> | <i>Vegetable (i.e. Salad), Medium-Fat Protein (i.e. Hard-Boiled Egg)</i>                                  | <i>Non-Starchy Vegetable (i.e. Celery Sticks), Fruit (i.e. Seedless Grapes)</i>                 | <i>Non-Starchy Vegetable (i.e. Baby Carrots), Fruit (i.e. Tangerine)</i> |
